# Supplementary material for: Assembly of polythiophenes on responsive polymer microgels for the highly selective detection of ammonia gas
Source: Royal Society of Chemistry journal article supplement (doi:10.1039/c5py02014j), 2016-01-01
Supplement: c5py02014j1.pdf [file c5py02014j1.pdf]

## Electronic Supplementary Information (ESI)

### Assembly of polythiophenes on responsive polymer microgels for highly selective detection of ammonia gas

Aiping Chang<sup>a</sup>, Yahui Peng<sup>a</sup>, Zezhou Li<sup>a</sup>, Xiang Yu<sup>b,c</sup>, Kunlun Hong<sup>c</sup>, Shuiqin Zhou<sup>d</sup> and Weitai Wu<sup>a,\*</sup>

<sup>a</sup> *State Key Laboratory for Physical Chemistry of Solid Surfaces, Collaborative Innovation Center of Chemistry for Energy Materials, The Key Laboratory for Chemical Biology of Fujian Province, and Department of Chemistry, College of Chemistry and Chemical Engineering, Xiamen University, Xiamen, Fujian 361005, China*

<sup>b</sup> *Chemical Sciences Division, Oak Ridge National Laboratory, P.O. Box 2008, Oak Ridge, Tennessee 37831, United States*

<sup>c</sup> *Center for Nanophase Materials Sciences, Oak Ridge National Laboratory, P.O. Box 2008, Oak Ridge, Tennessee 37831, United States*

<sup>d</sup> *Department of Chemistry and The Center for Engineered Polymeric Materials of College of Staten Island, and The Graduate Center, The City University of New York, Staten Island, New York 10314, United States*

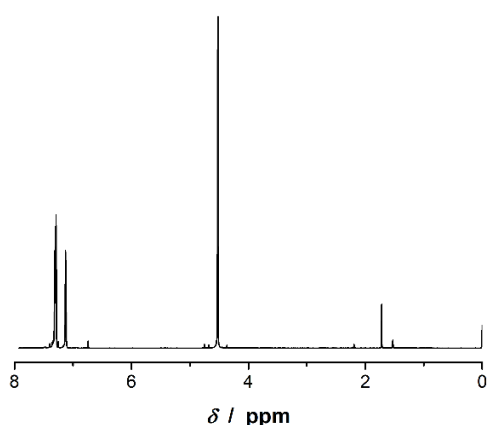

**Fig. S1.** <sup>1</sup>H NMR spectrum of compound 1 in CDCl<sub>3</sub>.

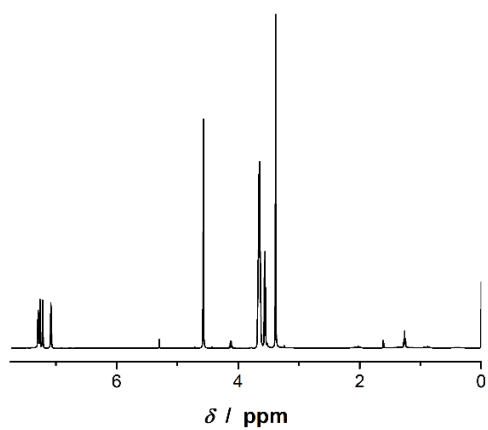

**Fig. S2.**  $^1\text{H}$  NMR spectrum of compound 2 in  $\text{CDCl}_3$ .

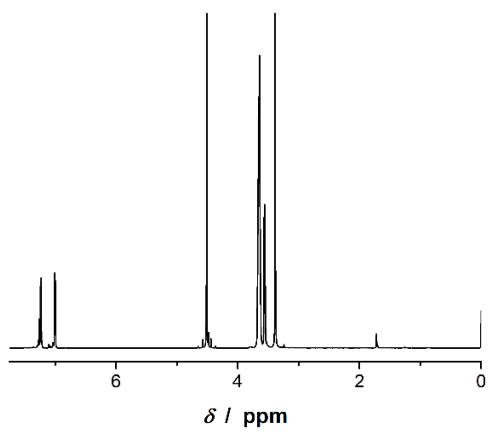

**Fig. S3.**  $^1\text{H}$  NMR spectrum of compound 3 in  $\text{CDCl}_3$ .

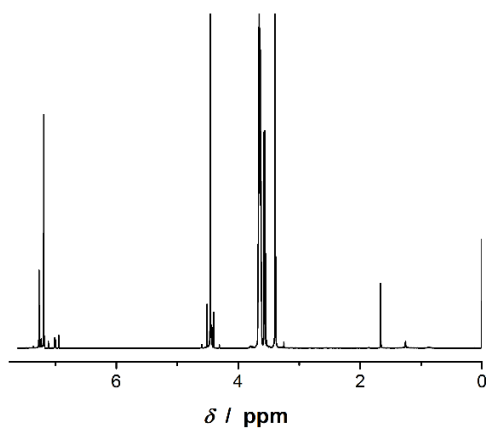

**Fig. S4.**  $^1\text{H}$  NMR spectrum of compound 4 in  $\text{CDCl}_3$ .

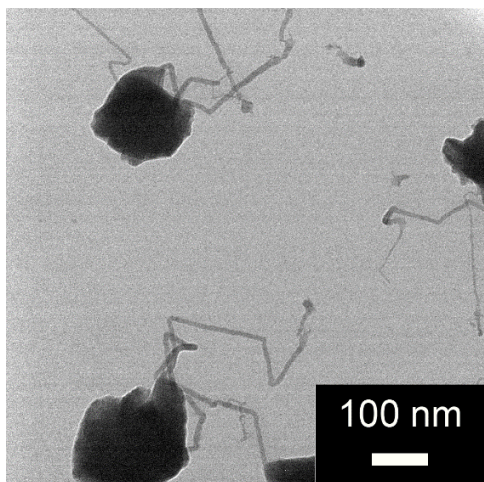

**Fig. S5.** An amplified TEM image of AP-10.

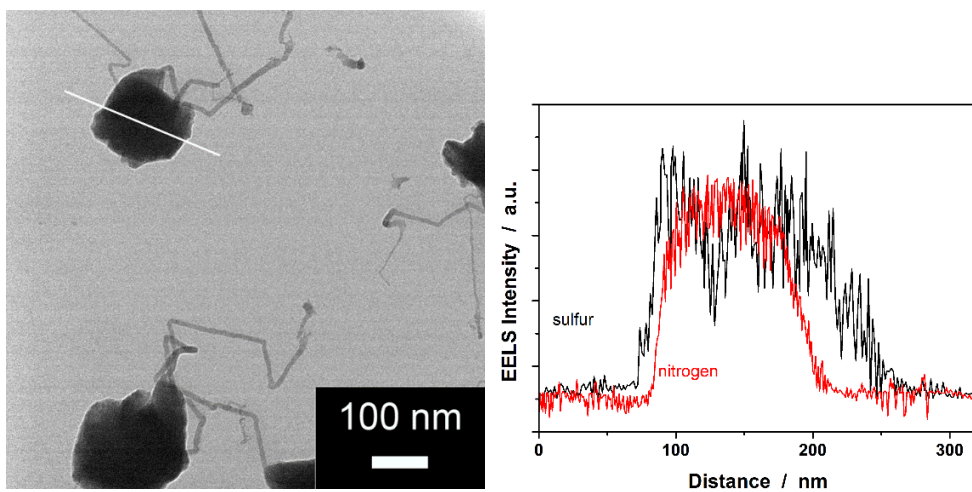

**Fig. S6.** EELS recorded on an individual particle of AP-10.

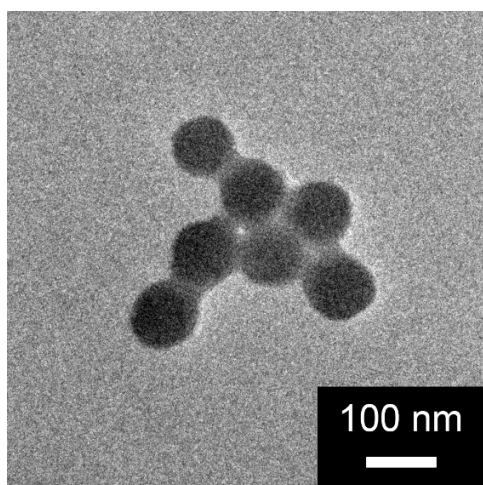

**Fig. S7.** Typical TEM image of ARM microgel templates.

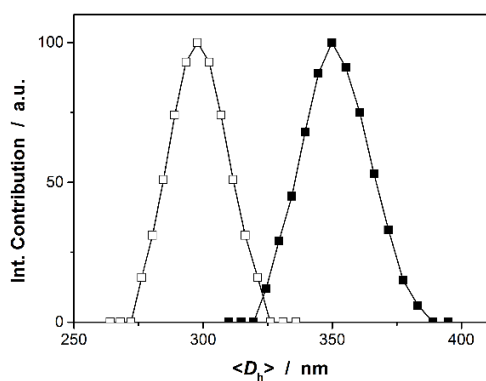

**Fig. S8** DLS size distribution of the AP-0.1 (■) and ARM microgels (□). All measurements were made at 25.0 °C.

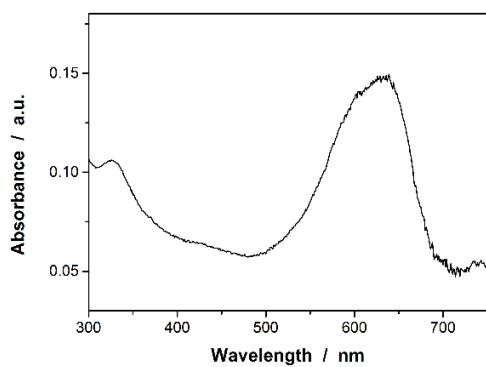

**Fig. S9.** UV-vis spectrum of ARM microgels.

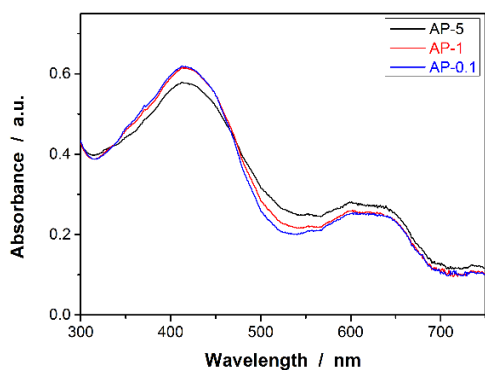

**Fig. S10.** Typical UV-vis absorption spectra of the films made of the composite materials AP-5, AP-1 AND AP-0.1.

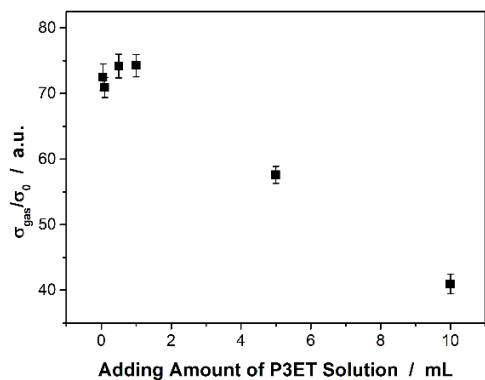

**Fig. S11** A comparison of the electrical response upon exposing to the ammonia gases (50.0 ppm), showing the effect of the adding amount of P3ET solution for preparing the composite materials.

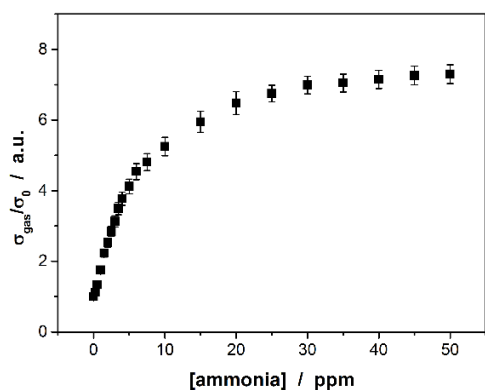

**Fig. S12** Electrical response of the P3ET films upon exposure to the ammonia gas.

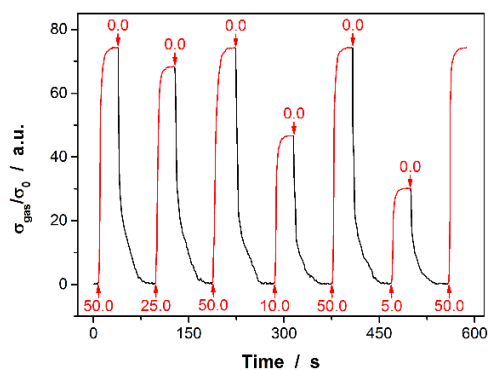

**Fig. S13** Electrical response cycles, upon the repeated exposing to the ammonia gas ([ammonia] = 50.0 ppm, 25.0 ppm, 10.0 ppm, or 5.0 ppm) and the N<sub>2</sub> gas (i.e., [ammonia] = 0.0 ppm), of the films made of AP-1.

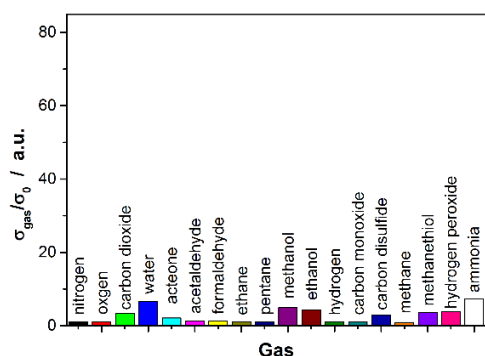

**Fig. S14** A comparison of the electrical response of the P3ET films upon exposing to the ammonia and non-ammonia gases (50.0 ppm).

**Table S1.** Interference Tests on Ammonia Concentration Reading by using the Films

| constituents                  | concentration | relative error <sup>a</sup> |
|-------------------------------|---------------|-----------------------------|
| acetone                       | 100 ppm       | +0.06%                      |
| methanol                      | 100 ppm       | +3.33%                      |
| ethanol                       | 100 ppm       | +3.14%                      |
| ethane                        | 100 ppm       | +0.02%                      |
| pentane                       | 100 ppm       | +0.01%                      |
| acetaldehyde                  | 100 ppm       | +0.01%                      |
| formaldehyde                  | 100 ppm       | +0.01%                      |
| CH <sub>3</sub> SH            | 100 ppm       | -3.57%                      |
| H <sub>2</sub>                | 100 ppm       | +0.01%                      |
| O <sub>2</sub>                | 100 ppm       | +0.01%                      |
| CO                            | 100 ppm       | +0.03%                      |
| CO <sub>2</sub> <sup>b</sup>  | 500 ppm       | +1.12%                      |
|                               | 5%            | +3.13%                      |
| CS <sub>2</sub>               | 100 ppm       | -4.52%                      |
| CH <sub>4</sub>               | 100 ppm       | +0.01%                      |
| H <sub>2</sub> O <sub>2</sub> | 100 ppm       | +2.31%                      |
|                               | 100 ppm       | +4.16%                      |
| H <sub>2</sub> O              | 250 ppm       | +5.27%                      |
|                               | 500 ppm       | -0.17%                      |

<sup>a</sup> “+” and “-” indicate an increase and decrease, respectively, in apparent ammonia concentration related to the actual ammonia concentration.

<sup>b</sup> The atmosphere contains ca. 400ppm CO<sub>2</sub>, and the air we exhale roughly contains 4-5% CO<sub>2</sub>.
